# Supplementary material for: Exploring Viral Interference Using Peptides: Molecular Determinants of HIV‐1 Inhibition by a Peptide Derived from Human Pegivirus‐1 Envelope Protein E2
Source: PubMed Central journal article supplement — ChemMedChem. 2021 Feb 3;16(8):1290–6. doi: 10.1002/cmdc.202000892 (PMC8248410; doi:10.1002/cmdc.202000892), 2021-02-03
Supplement: CMDC-16-1290-s001.pdf [file CMDC-16-1290-s001.pdf]

# ChemMedChem

Supporting Information

## **Exploring Viral Interference Using Peptides: Molecular Determinants of HIV-1 Inhibition by a Peptide Derived from Human Pegivirus-1 Envelope Protein E2**

Rebecca Hoffmann, Tamara Ruegamer, Johanna Schaubächer, Anette Rohrhofer, Peter Kirmeß, Karen M. Fiebig, Barbara Schmidt, and Jutta Eichler\*

1. HPLC chromatograms of synthesized peptides.

P6-2

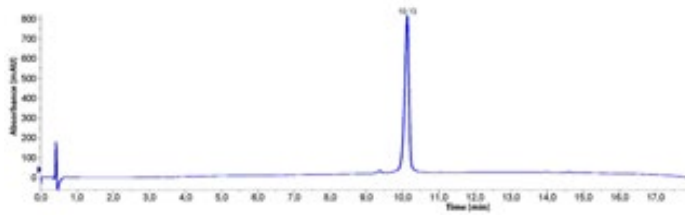

P6-2(Bio)

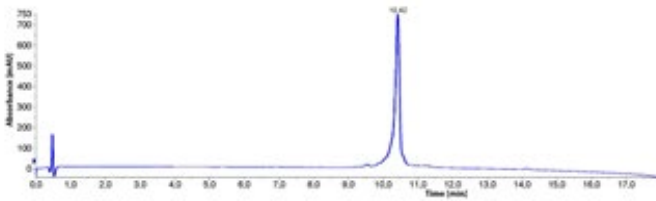

P6-2-1

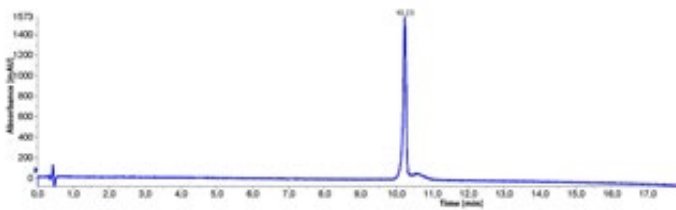

P6-2-3

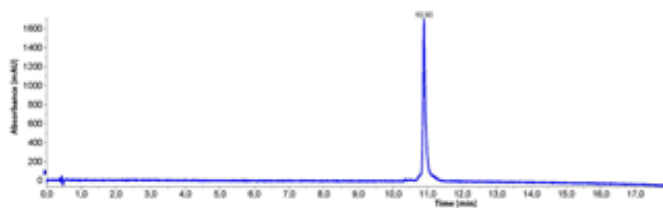

P6-2-4

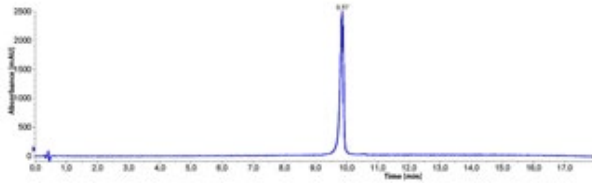

P6-2-5

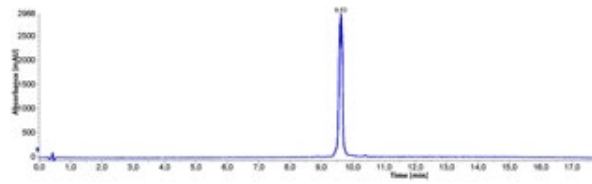

P6-2-6

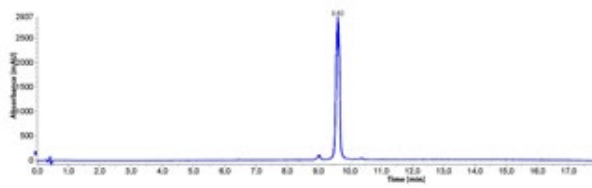

P6-2-7

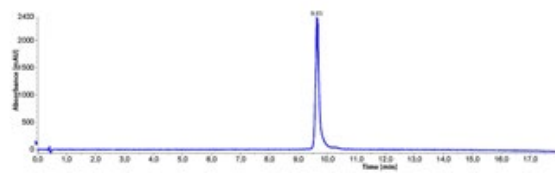

P6-2-7(Bio)

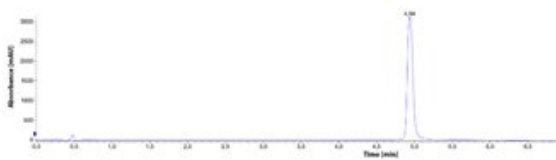

P6-2-8

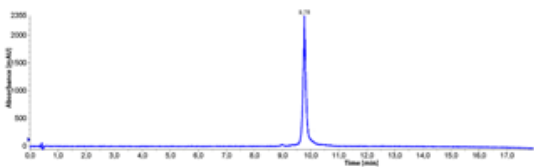

P6-2-9

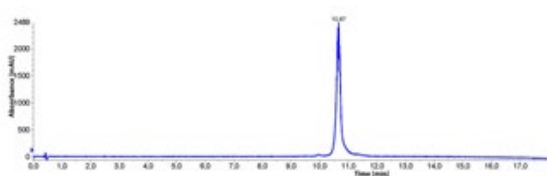

P6-2-10

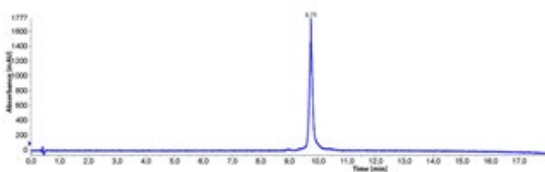

P6-2-11

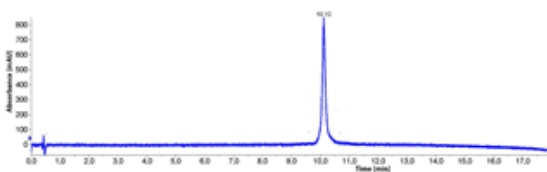

P6-2-12

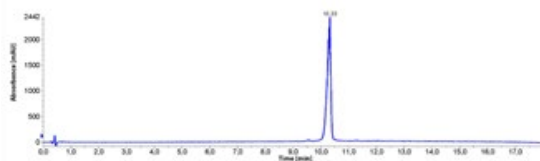

P6-2-13

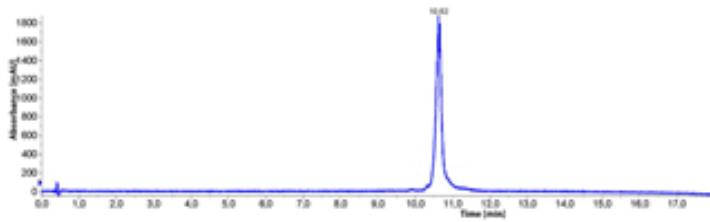

P2-14

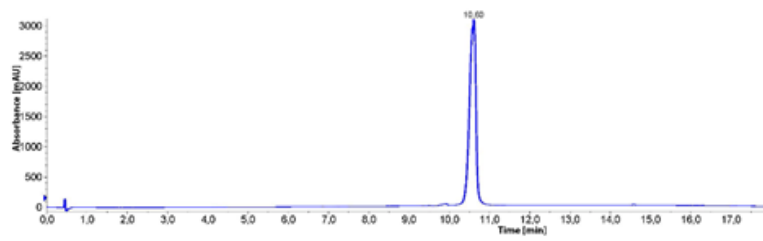

V3(Bio)

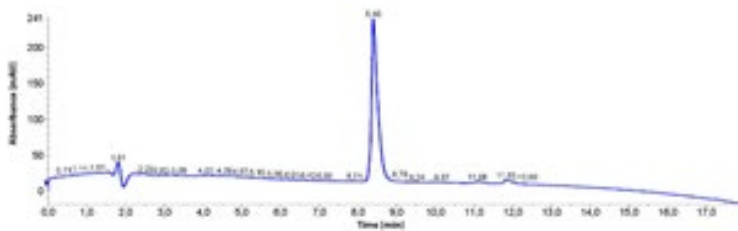

V3(Fluo)

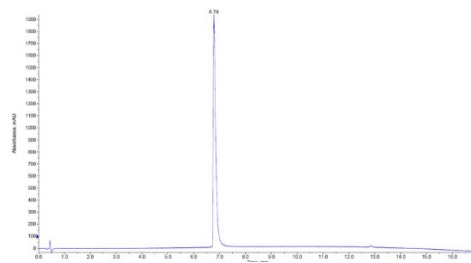

## 2. ESI-MS data of synthesized peptides

| Peptide     | Molar mass | [M+2H] <sup>2+</sup> |
|-------------|------------|----------------------|
| P6-2        | 2202       | 1102.9               |
| P6-2(Bio)   | 2501       | 1251.8               |
| P6-2-1      | 2189       | 1094.3               |
| P6-2-2      | 2189       | 1094.2               |
| P6-2-3      | 2189       | n.d.                 |
| P6-2-4      | 2469       | 1235.9               |
| P6-2-5      | 2469       | 1235.7               |
| P6-2-6      | 2469       | 1235.6               |
| P6-2-7      | 2156       | 1079.4               |
| P6-2-7(Bio) | 2452       | 1227.8               |
| P6-2-8      | 2089       | 1045.5               |
| P6-2-9      | 2177       | 1098.0               |
| P6-2-10     | 2089       | 1045.4               |
| P6-2-11     | 2177       | 1089.1               |
| P6-2-12     | 2204       | 1102.3               |
| P6-2-13     | 2262       | 1131.9               |
| P6-2-14     | 2859       | 1430.5               |
|             |            | [M+4H] <sup>4+</sup> |
| V3(Bio)     | 4629       | 1158.0               |
| V3(Fluo)    | 4824       | 1206.9               |
